# Supplementary material for: The APMAP interactome reveals new modulators of APP processing and beta-amyloid production that are altered in Alzheimer’s disease
Source: PubMed Central journal article supplement (PMC6354426; doi:10.1186/s40478-019-0660-3), 2019-01-31
Supplement: 40478_2019_660_MOESM1_ESM.pdf [file 40478_2019_660_MOESM1_ESM.pdf]

# **The APMAP interactome reveals new modulators of APP processing and beta-amyloid production that are altered in Alzheimer's disease**

Hermeto Gerber<sup>1,2,3</sup>, Sebastien Mosser<sup>1,2</sup>, Benjamin Boury-Jamot<sup>4</sup>, Michael Stumpe<sup>3</sup>, Alessandra Piersigilli<sup>5,6</sup>, Christine Goepfert<sup>5,6</sup>, Joern Dengjel<sup>3</sup>, Urs Albrecht<sup>3</sup>, Fulvio Magara<sup>4</sup> and Patrick C. Fraering<sup>1,2\*</sup>

<sup>1</sup>Foundation Ecllosion, CH-1228 Plan-les-Ouates, Switzerland, <sup>2</sup>Campus Biotech Innovation Park, CH-1202 Geneva, Switzerland, <sup>3</sup>Department of Biology, University of Fribourg, CH-1700 Fribourg, Switzerland, <sup>4</sup>Centre for Psychiatric Neuroscience, Department of Psychiatry, Lausanne University Hospital, CH-1015 Lausanne, Switzerland, <sup>5</sup>Institute of Animal Pathology, Vetsuisse Faculty, University of Bern, CH-3012 Bern, Switzerland, <sup>6</sup>School of Life Sciences, Ecole Polytechnique Fédérale de Lausanne, CH-1015 Lausanne, Switzerland.

\*Correspondence should be addressed to Patrick C. Fraering. Phone: +41786406462; Fax: +41228801013; E-mail: fraeringpatrick@hotmail.com

## **SUPPLEMENTARY FIGURES**

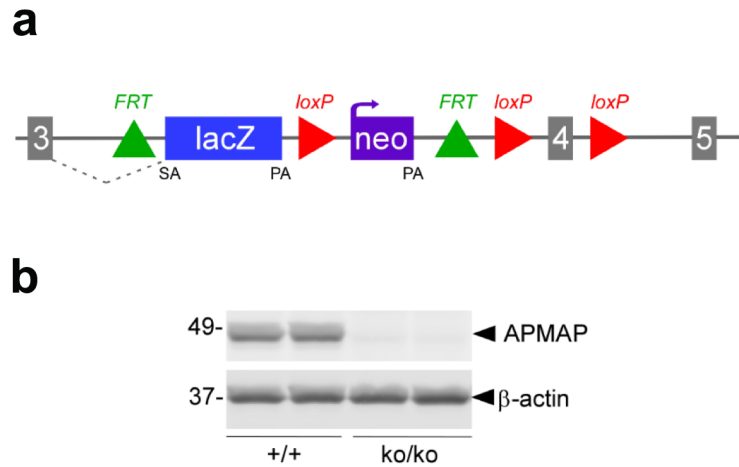

**Fig.S1** Generation of the APMAP-KO mouse line. **a** Schematic representation of the knockout-first construct (KOMP Repository; [www.komp.org](http://www.komp.org)) used for the generation of the APMAP full knockout mouse line. **b** The deleted APMAP protein expression was confirmed by Western blot analysis of whole brain extracts from 3-month-old APMAP-KO mice (ko/ko; n=2) and WT mice (+/+; n=2).  $\beta$ -Actin served as a protein loading control.

**a**

|                                    |
|------------------------------------|
| Skin                               |
| Mammalian gland                    |
| Heart                              |
| Tongue                             |
| Sternum / Bone marrow              |
| Thymus                             |
| Trachea                            |
| Oesophagus                         |
| Thyroid                            |
| Salivary gland                     |
| Mandibular Lymphnodes              |
| Lung                               |
| Stomach                            |
| Small Intestine                    |
| Large Intestine                    |
| Liver                              |
| Kidney right and left              |
| Urinary bladder                    |
| Spleen                             |
| Pancreas                           |
| White adipose tissue               |
| Spine (cervical, thoracic, lumbar) |
| Knee (joint, bones, muscles)       |
| Head (multiple cross sections)     |
| Brain (1 hemisphere)               |

|                              |
|------------------------------|
| <b>Female genital tract:</b> |
| Uterus                       |
| Ovary right and left         |
| Vagina                       |

|                            |
|----------------------------|
| <b>Male genital tract:</b> |
| Testis right and left      |
| Seminal vesicle            |
| Prostate                   |
| Preputial glands           |

**b**

|                                                          | chow diet   |                | high fat diet |                | significance                                    |
|----------------------------------------------------------|-------------|----------------|---------------|----------------|-------------------------------------------------|
|                                                          | n per group | grade / score  | n per group   | grade / score  |                                                 |
| <b>Lung</b>                                              |             |                |               |                |                                                 |
| leucocytic infiltrates                                   | ko-4, wt-8  | ko 1.8, wt 3.7 | ko-3, wt-1    | ko 3, wt 2.5   | inflammatory change                             |
| <b>Kidney</b>                                            |             |                |               |                |                                                 |
| leucocytic infiltrates, perivascular                     | ko-8, wt-10 | ko 3.8, wt 4.1 | ko-4, wt-3    | ko 3.7, wt 2.8 | background lesion                               |
| tubular lipidosis                                        | ko-3, wt-3  | ko 1.2, wt 1.2 | ko-5, wt-2    | ko-1.8, wt 1.2 | incidental finding                              |
| tubular basophilia                                       | ko-1, wt-2  |                |               |                | background lesion                               |
| tubular proteinaceous casts                              | wt-2        |                | wt-1          |                | background lesion                               |
| basement membrane thickening                             | wt-1        |                |               |                | background lesion                               |
| glomerular sklerosis                                     | wt-1        |                | ko-1          |                | background lesion                               |
| mesangial cell proliferation                             | wt-1        |                | wt-2          |                | background lesion                               |
| <b>Liver</b>                                             |             |                |               |                |                                                 |
| leucocytic infiltrates                                   | ko-3, wt-7  | ko 1.1, wt 2.5 | ko-5, wt-2    | ko 4.8, wt 1.2 | inflammatory change                             |
| hepatic lipidosis                                        | ko-0, wt-0  |                | ko-5, wt-5    | ko 8, wt 8     | diet related<br>related to<br>inflammation      |
| extramedullary hematopoiesis                             | ko-2, wt-1  |                | wt-2          |                |                                                 |
| <b>Stomach</b>                                           |             |                |               |                |                                                 |
| leucocytic infiltrates                                   | ko-4, wt-4  | ko 1.3, wt 1   | ko-1, wt-0    | ko 1.2         | inflammatory change                             |
| <b>Oesophagus</b>                                        |             |                |               |                |                                                 |
| bacteria intracorneal                                    |             |                | ko-1, wt-1    |                | incidental finding                              |
| <b>Spleen</b>                                            |             |                |               |                |                                                 |
| activated lymph follicles                                | ko-0, wt-1  |                | ko-2, wt-2    |                | background lesion                               |
| hemosiderosis                                            | ko-6, wt-3  | ko 2.7, wt 1.7 | ko-1, wt-0    | ko 1.2         | background lesion<br>related to<br>inflammation |
| extramedullary hematopoiesis                             | ko-1, wt-1  |                | ko-1, wt-0    |                |                                                 |
| <b>Salivary gland</b>                                    |             |                |               |                |                                                 |
| leucocytic infiltrates                                   | ko-7, wt-8  | ko 4, wt 4.2   | ko-3, wt-1    | ko 3.6, wt 1   | background lesion                               |
| <b>Lymph nodes (mandibular, mediastinal, mesenteric)</b> |             |                |               |                |                                                 |
| activated lymph follicles                                |             |                | ko-2, wt-3    |                | background lesion                               |
| sinus histiocytosis                                      | ko-4, wt-7  | ko 2.5, wt 3.7 | ko-5, wt-12   | ko 5.3, wt 1.9 | background lesion                               |
| <b>Pancreas</b>                                          |             |                |               |                |                                                 |
| leucocytic infiltrates                                   | ko-3, wt-6  | ko 1.7, wt 3.3 | ko-0, wt-0    |                | inflammatory change                             |
| <b>Testis</b>                                            |             |                |               |                |                                                 |
| leucocytic infiltrates                                   | ko-1, wt-2  | ko-1, wt-1.17  | ko-0, wt-1    | wt 1           | background lesion                               |
| <b>Seminal Vesicles</b>                                  |             |                |               |                |                                                 |
| histiocytes intraluminal                                 |             |                | ko-1          |                | incidental finding                              |
| <b>Preputial glands</b>                                  |             |                |               |                |                                                 |
| leucocytic infiltrates                                   | ko-2, wt-2  | ko 2.3, wt 1.5 | ko-3, wt-2    | ko 2.8, wt 1.6 | background lesion                               |
| fibrosis                                                 | ko-0, wt-1  |                |               |                | background lesion                               |
| cystic dilation                                          | ko-1, wt-3  |                | wt-3          |                | background lesion                               |
| <b>Skin</b>                                              |             |                |               |                |                                                 |
| leucocytic infiltrates w/wo bacteria                     |             |                | ko-4, wt-3    | ko-3.6, wt 2.6 | inflammatory change                             |
| <b>Gingiva</b>                                           |             |                |               |                |                                                 |
| leucocytic infiltrates                                   |             |                | ko-1          | ko 0.8         | incidental finding                              |
| <b>Muscle</b>                                            |             |                |               |                |                                                 |
| leucocytic infiltrates                                   |             |                | ko-1          |                | incidental finding                              |
| muscle fiber regeneration                                |             |                | ko-1          |                | incidental finding                              |
| <b>Urinary bladder</b>                                   |             |                |               |                |                                                 |
| leucocytic infiltrates                                   | wt-1        |                |               |                | background lesion                               |

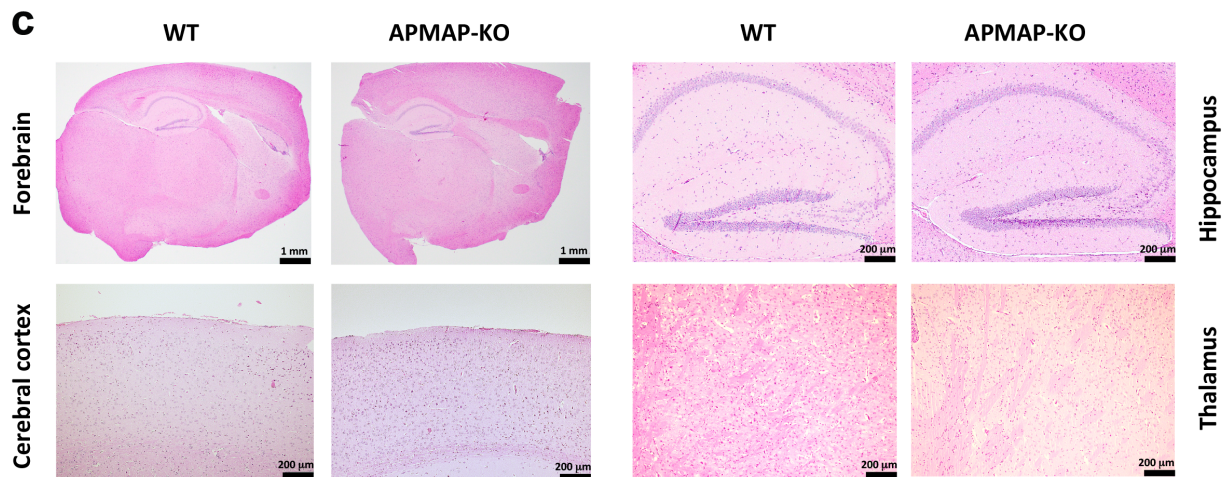

**Fig.S2** Morpho-pathological characterization of APMAP-KO mice. **a** Organs and tissues analyzed to assess whether the biallelic deletion of the gene coding for APMAP induces macroscopic and/or microscopic morphological changes. **b** No significant morphological changes (graded from 0 to 6 according to their degree of severity) were recorded in the APMAP-KO groups compared to the age and sex-matched WT control animals, fed with chow or high fat diets. The phenotypic observations are not related to the specific genotype, as confirmed by the non-significant semi-quantitative histopathologic scores among the different groups, and by the intra- and intergroup low incidence. Mice on a chow diet were aged 7 to 9 months, with n=10 mice/group (equally distributed between males and females). Mice on a high fat diet were aged 4 months, with n=5 males/group. **c** APMAP deficiency does not affect morphology of neural tissues. Sagittal brain sections from 9 month-old WT and APMAP-KO mice stained with hematoxylin and eosin. Specific tissue is indicated at left of each pair of panels. Scale bars, 1 mm for brain and 200  $\mu$ m for hippocampus, cerebral cortex and thalamus.

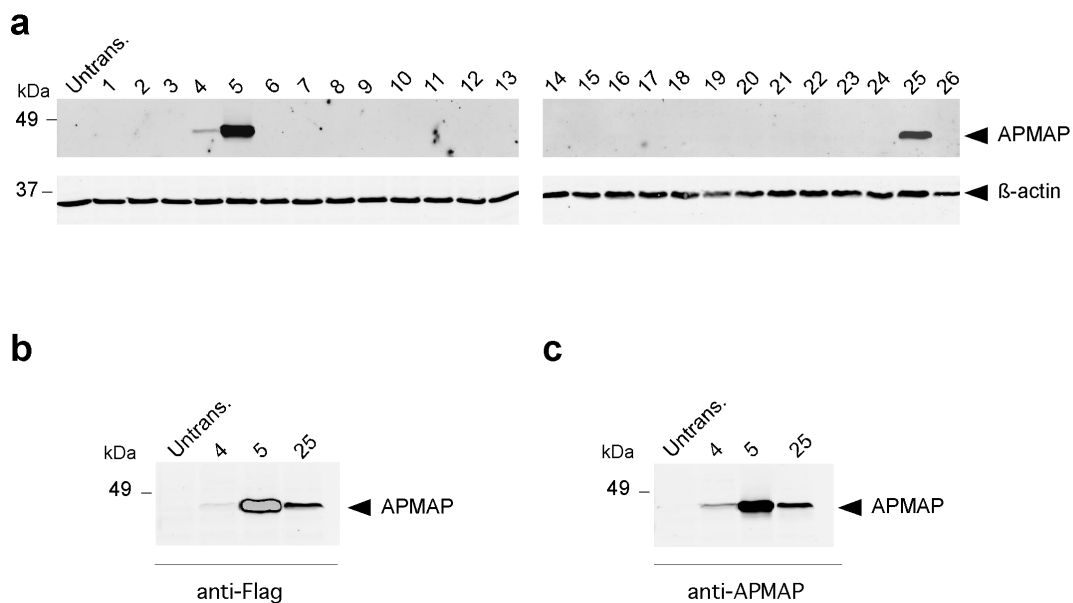

**Fig.S3** Generation and selection of a CHO cell line stably overexpressing APMAP for the high-grade purification of APMAP and associated proteins. **a** Clonal selection of a CHO cell line stably overexpressing APMAP. Chinese hamster ovary adherent cells were transfected with a plasmid harboring APMAP1-Flag and selection was performed in DMEM containing 300  $\mu$ g/ml Geneticin G418. After 21 days of selection, single cell cultures were inoculated into 96-well plates by limiting dilution. Of all recovered clonal cell lines, 26 were screened for APMAP expression and the highest producers were maintained in culture for further analysis. **b, c** Whole cell extracts were prepared and analyzed by Western blot with anti-Flag (**b**) or anti-APMAP (**c**) antibodies. The highest producer (clone 5) was further adapted for cultures in suspension and used for the purification of APMAP and associated proteins.

## CP1

Q9HDC9 (100%), 46,481.5 Da

Adipocyte plasma membrane-associated protein OS=Homo sapiens GN=APMAP PE=1 SV=2

36 exclusive unique peptides, 50 exclusive unique spectra, 173 total spectra, 212/416 amino acids (51% coverage)

|            |            |            |            |            |             |
|------------|------------|------------|------------|------------|-------------|
| MSEADGLRQR | RPLRPPQVVT | DDGQAPEAKD | GSSFSGRVFR | VTFLMLAVSL | TVPLLGAAML  |
| LESPIDPQPL | SFKPPLLLG  | VLHPNTKLRQ | AERLFENQLV | GPESIAHIGD | VMFTGTADGR  |
| VVKLENGEIE | TIARFGSGPC | KTRDDEPVCG | RPLGIRAGPN | GTLFVADAYK | GLFEVNPWKR  |
| EVKLLLSSET | PIEGKNMSFV | NDLTVTQDGR | KIYFTDSSSK | WQRRDYLLLV | MEGTDDGRL   |
| EYDTVTR    | VLLDQLRFPN | GVQLSPAEDF | VLVAETTMR  | IRRVYVSGLM | KGADL FVEN  |
| MPGFPDNIRP | SSSGGYWVGM | STIRPNPGFS | MLDFLSERPW | IKRMIFKLF  | QETVMK FVPR |
| YSLVLELSDS | GAFRRSLHDP | DGLVATYISE | VHEHDGHLYL | GSFRSPFLCR | LSLQAV      |

## CP2

Q9HDC9 (100%), 46,481.5 Da

Adipocyte plasma membrane-associated protein OS=Homo sapiens GN=APMAP PE=1 SV=2

32 exclusive unique peptides, 40 exclusive unique spectra, 126 total spectra, 196/416 amino acids (47% coverage)

|            |            |            |            |            |             |
|------------|------------|------------|------------|------------|-------------|
| MSEADGLRQR | RPLRPPQVVT | DDGQAPEAKD | GSSFSGRVFR | VTFLMLAVSL | TVPLLGAAML  |
| LESPIDPQPL | SFKPPLLLG  | VLHPNTKLRQ | AERLFENQLV | GPESIAHIGD | VMFTGTADGR  |
| VVKLENGEIE | TIARFGSGPC | KTRDDEPVCG | RPLGIRAGPN | GTLFVADAYK | GLFEVNPWKR  |
| EVKLLLSSET | PIEGKNMSFV | NDLTVTQDGR | KIYFTDSSSK | WQRRDYLLLV | MEGTDDGRL   |
| EYDTVTR    | VLLDQLRFPN | GVQLSPAEDF | VLVAETTMR  | IRRVYVSGLM | KGADL FVEN  |
| MPGFPDNIRP | SSSGGYWVGM | STIRPNPGFS | MLDFLSERPW | IKRMIFKLF  | QETVMK FVPR |
| YSLVLELSDS | GAFRRSLHDP | DGLVATYISE | VHEHDGHLYL | GSFRSPFLCR | LSLQAV      |

P12763 (100%), 38,417.4 Da

Alpha-2-HS-glycoprotein OS=Bos taurus GN=AHSG PE=1 SV=2

3 exclusive unique peptides, 3 exclusive unique spectra, 5 total spectra, 38/359 amino acids (11% coverage)

|            |            |            |            |            |              |
|------------|------------|------------|------------|------------|--------------|
| MKSFVLLFCL | AQLWGCHSIP | LDPVAGYKEP | ACDDPDTEQA | ALAAVDYINK | HLPRGYKHTL   |
| NQIDSVKVP  | RRPTGEVYDI | EIDTLETTCH | VLDPTPLANC | SVRQQTQHAV | EGDCDIHVLLK  |
| QDGGQFSVLF | KCDSSPDSAE | DVRKLCPCDC | LLAPLNDSRV | VHAVEVALAT | FNAESNGSYL   |
| QLVEISRQAF | VPLPVSVSVE | FAVAATDCIA | KEVVDPTKCN | LLAEKQYGF  | KGSVIQKALG   |
| GEDVRVTCTL | FQTQPVIPQP | QPDGAEAEAP | SAVPDAAGPT | PSAAGPPVAS | VVVGPSVVAV   |
| PLPLHRAHYD | LRHTFSGVAS | VESSSGEAFH | VGKTPIVQGP | SIPGGPVR   | LC PGRIRYFKI |

## CP3

Q9HDC9 (100%), 46,481.5 Da

Adipocyte plasma membrane-associated protein OS=Homo sapiens GN=APMAP PE=1 SV=2

22 exclusive unique peptides, 25 exclusive unique spectra, 73 total spectra, 178/416 amino acids (43% coverage)

|            |            |            |            |            |             |
|------------|------------|------------|------------|------------|-------------|
| MSEADGLRQR | RPLRPPQVVT | DDGQAPEAKD | GSSFSGRVFR | VTFLMLAVSL | TVPLLGAAML  |
| LESPIDPQPL | SFKPPLLLG  | VLHPNTKLRQ | AERLFENQLV | GPESIAHIGD | VMFTGTADGR  |
| VVKLENGEIE | TIARFGSGPC | KTRDDEPVCG | RPLGIRAGPN | GTLFVADAYK | GLFEVNPWKR  |
| EVKLLLSSET | PIEGKNMSFV | NDLTVTQDGR | KIYFTDSSSK | WQRRDYLLLV | MEGTDDGRL   |
| EYDTVTR    | VLLDQLRFPN | GVQLSPAEDF | VLVAETTMR  | IRRVYVSGLM | KGADL FVEN  |
| MPGFPDNIRP | SSSGGYWVGM | STIRPNPGFS | MLDFLSERPW | IKRMIFKLF  | QETVMK FVPR |
| YSLVLELSDS | GAFRRSLHDP | DGLVATYISE | VHEHDGHLYL | GSFRSPFLCR | LSLQAV      |



A0A061I3K8 (100%), 160,726.0 Da  
 Calnexin OS=Cricetulus griseus GN=H671\_7g18220 PE=3 SV=1  
 15 exclusive unique peptides, 18 exclusive unique spectra, 22 total spectra, 109/1479 amino acids (7% coverage)

|                    |                    |                   |                    |                   |                    |                 |    |
|--------------------|--------------------|-------------------|--------------------|-------------------|--------------------|-----------------|----|
| MEGKWL LCLL        | LVLGTVAVQA         | HDGHDDDMID        | IEDDLDDVIE         | EVEDSK            | <b>SKSD</b>        | <b>SSTPPSPK</b> | VT |
| YK <b>APVPTGEV</b> | <b>YFADSFDR</b> GS | LSGWILSK          | <b>AK</b>          | <b>KDDTDDEIAK</b> | YDGKWEVDEM         | KDTKLPDGDKG     |    |
| LVLMSRAKHH         | AISAKLNKPF         | LFDTKPLIVQ        | YEVNFQNGIE         | CGGAYVKLLS        | K <b>TSELNLDQF</b> |                 |    |
| <b>HDK</b> TPYTIMF | GPDKCGEDYK         | LHFI FRHKNP       | KTGVYEEKHA         | KRPDTDLKIY        | FTDKKTHLYT         |                 |    |
| LILNPDNSFE         | ILVDQYVVNS         | GNLLNDMTPA        | VNPSREIEDP         | EDQKPEDWDE        | RPKIPDPDAV         |                 |    |
| KPDDWDEDAP         | GKIPDEEATK         | PEGWLDDEPE        | YIPDPDADKP         | EDWDEMDDGE        | WEAPQIANPK         |                 |    |
| CESAPGCGVW         | QR <b>PLIDNPY</b>  | <b>KGKWKPPMID</b> | NPNYQGVWKP         | RKIPNPDFFE        | DLEPFKMTPF         |                 |    |
| SAIGLELWSM         | TSDIFFDNFI         | ISGDRRVVDD        | WANDGWGLK <b>K</b> | <b>AADGAAEPGV</b> | <b>VGHMLEAEE</b>   |                 |    |
| RPWLWVYIL          | TVALPVFLVI         | LFCCSGKKQS        | NAMEYK <b>KTDA</b> | <b>AQPDVKEDEG</b> | <b>KEEEKNKGD</b>   |                 |    |
| <b>EEEEKLEEK</b>   | QKSDAEEEDGG        | TGSQDEEDRK        | PTAEEDEILN         | RSPRNRKPRR        | ESWDLWHLHD         |                 |    |
| TVKRNLD SAA        | SPQNGDQNG          | YGDLPFGHKK        | TRREAPLGIS         | VSANGLPPAS        | PLGQPKPPG          |                 |    |
| GDALQSGGKH         | SLGLDPIINCK        | CMADSSIEHLN       | GSSNPNPFP          | LSLSKELKQE        | PVDDPLCMIA         |                 |    |
| GAGGSVSSSN         | LMPDLNLNEQ         | EWKELIEELN        | RSVPDEDMKD         | LFTEDFEKKE        | DPEPPGSATQ         |                 |    |
| TPLAQDINIK         | TEFSPA AFEQ        | EQLGSPQVRA        | GSAGQTFLLGP        | SSAPVGTDS         | SLGSSQTLFH         |                 |    |
| TTGQPGADNP         | SANLMPASAQ         | AQNAQRALAS        | VVLPSPQGG          | ASELSSAHQL        | QQIAAKQKRE         |                 |    |
| QMLQNPQAA          | SPAPAPQLST         | WQQAQPSHSP        | LDPVYPMEKP         | ASPPGYKQDF        | TNSKLLMMP          |                 |    |
| VNKSSPRPGG         | PYLQPSHNL          | LSHQSPSNLN        | QSSVNNQGA          | LDYGNTKPLS        | HYKADCQQG          |                 |    |
| PGSGQSKPAL         | MAYLPPQLPH         | LSNEQNSLFL        | MKQKAANMPF         | RS LVP PGQE       | NP SNV SPAQ        |                 |    |
| TANVGTQPPS         | VSVASTHNS          | PYLSQQQAA         | VMKQHQLLD          | QQKQREQQQL        | QQQQQQLQR          |                 |    |
| QHLLAEQEKQ         | QFQRPASAAP         | GMNNLGPSS         | SCPRVFPQPG         | TLMSMGQPHA        | PVSSLPSSSG         |                 |    |
| PQDRGVAQFT         | GSQSLPQSSL         | YGITSGLPQI        | VAQPPPQAAS         | AHAHI PRQTS       | VGQNASAPAA         |                 |    |
| YGGNSLGSAG         | LSQQAHNKGT         | PPGLTKSQVP        | RVSAAMGGQN         | ASWQHKGMPN        | LS SQT PGNSS       |                 |    |
| VSPFAAPSS          | HMQQAHLKIP         | GQQFSQAMP         | RPMAPMSAG          | AAGSMLPPVS        | TQRNSAPAP          |                 |    |
| APPQAAPQQG         | LPGLSPAGPE         | LGAFSQSS          | QMN SRAGLHC        | TQAYPVRTMG        | QELPFAFSGG         |                 |    |
| PGSSGLSSVA         | GHTDLIDSLL         | KNRTSEEWIN        | EELDDL LGSQ        |                   |                    |                 |    |

A0A061IIM78 (100%), 43,787.5 Da  
 Lysosome-associated membrane glycoprotein 1 OS=Cricetulus griseus GN=H671\_1g1762 PE=4 SV=1  
 2 exclusive unique peptides, 2 exclusive unique spectra, 2 total spectra, 23/407 amino acids (6% coverage)

|                    |                    |                    |             |             |            |
|--------------------|--------------------|--------------------|-------------|-------------|------------|
| MAAPGAPRSL         | LLLLLAGLAH         | GASALFVVKD         | SNGTACIMAN  | FSASFFTIYE  | TGHGSKNSTF |
| ELPSSAEVLN         | SNSSCGRENV         | SEPILTIAFG         | SGYLLTLNFT  | RNATRYSVQD  | MYFAYNLSDT |
| QHFLNASNK <b>G</b> | <b>IHSVDSSTDI</b>  | <b>KADINKTYRC</b>  | LSA IQVHMGN | VTVTLSDATI  | QAYLLNSNFS |
| KEETRCTQDG         | PSPTTVPPSP         | SPPLVPTNPT         | VIKYNTGEN   | GTCLLASMAL  | QMNITYMKKD |
| NMTVTRALNI         | SPNDTASGSC         | SPHVVTLTVE         | SKNSILD LKF | GMNGSSSLFF  | LQEVRLNMTL |
| PDANVSS LMA        | SNQSLR <b>ALQA</b> | <b>TVGNSYK</b> CNT | EEHIFVTKEF  | SLNVF SVVQV | AFKVESDRFG |
| SVEECMQDGN         | NMLIPIAVGG         | ALAGLVLIVL         | IAYLIGRKR S | HAGYQTI     |            |

G3H7X9 (100%), 68,661.3 Da  
 Nicastrin OS=Cricetulus griseus GN=I79\_006475 PE=4 SV=1  
 3 exclusive unique peptides, 3 exclusive unique spectra, 3 total spectra, 35/615 amino acids (6% coverage)

|              |                    |                   |                   |                   |            |
|--------------|--------------------|-------------------|-------------------|-------------------|------------|
| MV LLEGLKLFN | RAVMEK LKGR        | TSRIAGLAVT        | LAKPNSTSS F       | SPSVQCPNDG        | FGIYSNSYGS |
| EFAHCKQTLW   | NELGNGLAYE         | DFSFPILFLE        | DENETKVIKQ        | CYQDHNLAQN        | GSAPRFPLCA |
| MQLFSSHMHAV  | I STATCMRRS        | FIQSTFINS         | EIVCDPLSDY        | NVWSMLKPIN        | TSGALFPDDR |
| VVVAATR LDS  | RSFFWNVAPG         | AESAVASYVT        | QLAAAEALHK        | <b>ASDVATLPRN</b> | VMFVFFQGET |
| FDYIGSSRMV   | YDMENGFVP          | RLENIDSFVE        | LGQVALRTSL        | DLWMHTDPM         | QKNESVKNQV |
| EDLLVTLLEKS  | GAGVPEVFLR         | RQNQSDALPP        | SSLQRFLRAR        | NISGVVLADH        | SGSFHNRYYQ |
| S IYDTAENIN  | VTYPER <b>QSPE</b> | <b>EDLNFVTDTA</b> | <b>KALANVATVL</b> | <b>ARALYELAG</b>  | TNFSDSIQAD |
| PQTVTRLLYG   | FLVRANNSWF         | QSI LRQDLRS       | YLDGGLQHY         | I AVTSPNTT        | YVVQYALANL |
| TGKVTNL TRE  | QCQDPSKVPN         | ESKALYDYSW        | VQGPLNSNKT        | ERLPRCVRST        | VRLARALSPA |
| FELSVQWGST   | YSTWAESRWK         | DIQARIFLVA        | SKELEFITLT        | VGFGILIFSL        | IVTYCINAKA |
| DVLFVAPREP   | GAVSY              |                   |                   |                   |            |

F1LQ3 (100%), 126,405.1 Da  
 Reticulon OS=Rattus norvegicus GN=Rtn4 PE=1 SV=1  
 2 exclusive unique peptides, 2 exclusive unique spectra, 2 total spectra, 22/1163 amino acids (2% coverage)

|             |                    |                    |             |                   |                     |
|-------------|--------------------|--------------------|-------------|-------------------|---------------------|
| MEDI DQSSLV | SSSTDSPPRP         | PPAFKYQFVT         | EPEDEEDEEEE | EDEDEEDEDED       | LEELEVLERK          |
| PAAGLSAAAV  | PPAAAAPLL D        | FSSDSVPPAP         | RGPLPAAPP A | APERQPSWER        | SPAAPAPSLP          |
| PAAAVLPSKL  | PEDDEPPARP         | PPPPVAGASP         | LAEPAAPST   | PAAPKRRGSG        | SVDET L FALP        |
| AASEPVI PSS | AEKIMDLMEQ         | PGNTVSSGQE         | DFPVS LLETA | ASLPSLSPLS        | TVSFKEHGYL          |
| GNLSAVSSSE  | GTIEETLNEA         | SKELPERATN         | PFFVNRDLAEF | SELEYSEMGS        | SFKGSPKGES          |
| AILVENTKEE  | VIVRSKDKED         | LVCSSAALHSP        | QESPVGKEDR  | VVSPEKTM DI       | FNEMQMSVVA          |
| PVREEYADF K | PFEQAWEVKD         | TYEGS R D VLA      | ARANVESKVD  | RKCLLED SLEQ      | KS LGKDS EGR        |
| NEDASFPSTP  | EPVKDSSRAY         | ITCASFTSAT         | ESTTANTFPL  | LEDHTSENKT        | DEKKIEERKA          |
| QIITEKTS PK | TSNPFLVAVQ         | DSEADYVTTD         | TLSKVTEAAV  | SNMPEGLTPD        | LVQEACES EL         |
| NEATGTKIAY  | ETKVDLVQTS         | EAIQESLYPT         | AQLCPSFEAA  | EATPSPVLPD        | IVMEAPLNSL          |
| LP SAGASVVQ | PVS SPL EAPP       | PLSYDSIKLE         | PENPPPYEEA  | MNVALKALGT        | KEGIKEPESF          |
| NAAVQET EAP | YIS IACDLIK        | ETKLKSTEPS         | DFSNSSEIAK  | FEKSVPEHAE        | LVEDSSPSE           |
| PVDLFSDDSI  | PEVPPTQEEA         | VMLMKESTE          | VSETVAQHKE  | ERLSASPEQL        | GKPYLESFQP          |
| NLHSTKDAAS  | NDIPTLTKKE         | KISLQMEEFN         | TAIYSNDDLL  | SSKEDKIKES        | ETFS DSSPIE         |
| IIDEFPTFVS  | AKDIPSPKLAK        | EYTDLEVSDK         | SEIANIQSGA  | DSLPCLELPC        | DLSFKNIYPK          |
| DEVHVSDEF S | ENRSSVSKAS         | ISPSNVSALE         | PQTEMGSIVK  | SKSLTKAEAK        | KLPSDTEKED          |
| RSLSAVLSAE  | LSKTSVV D LL       | YWRD I KKTGV       | VFGASLFLLL  | SLTVFVSVSV        | TAYIALALLS          |
| VTISFRIYKVG | YIQAIQK <b>SDE</b> | <b>GHPFR</b> AYLES | EVAISEELVQ  | <b>KYSNSALGHV</b> | <b>NSTIK</b> ELRR L |
| FLVDDLVDSL  | KFAVLMWVFT         | YVGA LFNGLT        | LLILALISLF  | SIPVIYERHQ        | VQIDHYLGLA          |
| NKSVK DAMAK | IQA KIPGLKR        | KAD                |             |                   |                     |



# CP6

Q9HDC9 (100%), 46,481.5 Da

Adipocyte plasma membrane-associated protein OS=Homo sapiens GN=APMAP PE=1 SV=2

31 exclusive unique peptides, 37 exclusive unique spectra, 59 total spectra, 204/416 amino acids (49% coverage)

|            |            |            |            |              |             |
|------------|------------|------------|------------|--------------|-------------|
| MSEADGLRQR | RPLRPQVVTD | DDGQAPEAKD | GSSFSGRVFR | VTFLMLAVSL   | TVPLLGAMML  |
| LESPIDPQPL | SFKEPPLLLG | VLHPNPKLRQ | AERLLENQLV | GPESIAHIGD   | VMFTGTADGR  |
| VVKLENGEIE | TIARFGSGPC | KTRDDEPVCG | RPLGIRAGPN | GTLFVADAYK   | GLFEVNPWKR  |
| EVKLLLSSET | PIEGKNMSFV | NDLTVTQDGR | KIYFTDSSSK | WQRRDYLLLV   | MEGTTDDGRLL |
| EYDVTREVK  | VLLDQLRFPN | GVQLSPAEDF | VLVAETTMAR | IRRVYVSGLM   | KGGADLFVEN  |
| MPGFPDNIRP | SSSGGYWVGM | STIRPNPGFS | MLDFLSERPW | IKRMIFKLFSS  | QETVMK FVPR |
| YSLVLELSDS | GAFRRSLHDP | DGLVATYISE | VHEHDGHLYL | GSRFRSFPFLCR | LSLQAV      |

A0A061M78 (100%), 43,787.5 Da

Lysosome-associated membrane glycoprotein 1 OS=Cricetulus griseus GN=H671\_1g1762 PE=4 SV=1

2 exclusive unique peptides, 2 exclusive unique spectra, 2 total spectra, 23/407 amino acids (6% coverage)

|                     |                     |                     |                     |                     |                     |
|---------------------|---------------------|---------------------|---------------------|---------------------|---------------------|
| MAAPGAPRSL          | L L L L L A G L A H | G A S A L F V V K D | S N G T A C I M A N | F S A S F F T I Y E | T G H G S K N S T F |
| E L P S S A E V L N | S N S S C G R E N V | S E P I L T I A F G | S G Y L L T L N F T | R N A T R Y S V Q D | M Y F A Y N L S D T |
| Q H F L N A S N K G | I H S V D S S T D I | K A D I N K T Y R C | L S A I Q V H M G N | V T V T L S D A T I | Q A Y L L N S N F S |
| K E E T R C T Q D G | P S P T T V P P S P | S P P L V P T N P T | V I K Y N V T G E N | G T C L L A S M A L | Q M N I T Y M K K D |
| N M T V T R A L N I | S P N D T A S G S C | S P H V V T L T V E | S K N S I L D L K F | G M N G S S S L F F | L Q E V R L N M T L |
| P D A N V S S L M A | S N Q S L R A L Q A | T V G N S Y K C N T | E E H I F V T K E F | S L N V F S V Q V Q | A F K V E S D R F G |
| S V E E C M Q D G N | N M L I P I A V G G | A L A G L V L I V L | I A Y L I G R K R S | H A G Y Q T I       |                     |

A0A061I3K8 (100%), 160,726.0 Da

Calnexin OS=Cricetulus griseus GN=H671\_7g18220 PE=3 SV=1

21 exclusive unique peptides, 24 exclusive unique spectra, 30 total spectra, 141/1479 amino acids (10% coverage)

|                     |                     |                     |                     |                     |                     |
|---------------------|---------------------|---------------------|---------------------|---------------------|---------------------|
| M E G K W L L C L L | L V L G T V A V Q A | H D G H D D D M I D | I E D D L D D V I E | E V E D S K S K S D | S S T P P S P K V T |
| Y K A P V P T G E V | Y F A D S F D R G S | L S G W I L S K A K | K D D T D D E I A K | Y D G K W E V D E M | K D T K L P G D K G |
| L V L M S R A K H H | A I S A K L N K P F | L F D T K P L I V Q | Y E V N F Q N G I E | C G G A Y V K L L S | K T S E L N L D Q F |
| H D K T P Y T I M F | G P D K C G E D Y K | L H F I F R H K N P | K T G V Y E E K H A | K R P D T D L K I Y | F T D K K T H L Y T |
| L I L N P D N S F E | I L V D Q Y V V N S | G N L L N D M T P A | V N P S R E I E D P | E D Q K P E D W D E | R P K I P D P D A V |
| K P D D W D E D A P | G K I P D E E A T K | P E G W L D D E P E | Y I P D P D A D K P | E D W D E D M D G E | W E A P Q I A N P K |
| C E S A P G C G V P | Q R P L I D N P N Y | K G K W K P P M I D | N P N Y Q G V W K P | R K I P N P D F F E | D L E P F K M T P F |
| S A I G L E L W S M | T S D I F F D N F I | I S G D R R V V D D | W A N D G W G L K K | A A D G A A E P G V | V G H M L E A A E E |
| R P W L W V V I L L | T V A L P V F L V I | L F C C S G K K Q S | N A M E Y K K T D A | A Q P D V K E D E G | K E E E K N K G D E |
| E E E E E K L E E K | Q K S D A E E D G G | T G S Q D E E D R K | P T A E E D E I L N | R S P R N R K P R R | E S W D L W H L H D |
| T V K R N L D S A A | S P Q N G D Q Q N G | Y G D L F P G H K K | T R R E A P L G I S | V S A N G L P P A S | P L G Q D P K P P G |
| G D A L Q S G G K H | S L G L D P I N K K | C M A D S S I H L N | G S S N P N E P F P | L S L S K E L K Q E | P V D D L P C M I A |
| G A G G S V S Q S N | L M P D L N L N E Q | E W K E L I E E L N | R S V P D E D M K D | L F T E D F E E K K | D P E P P G S A T Q |
| T P L A Q D I N I K | T E F S P A A F E Q | E Q L G S P Q V R A | G S A G Q T F L G P | S S A P V G T D S P | S L G S S Q T L F H |
| T T G Q P G A D N P | S P N L M P A S A Q | A Q N A Q R A L A S | V V L P S Q G P G G | A S E L S A H A Q L | Q Q I A A K Q K R E |
| Q M L Q N P Q Q A A | S A P A P G Q L S T | W Q Q A G P S H S P | L D V Y P P M E K P | A S P P G Y K Q D F | T N S K L L M M P S |
| V N K S S P R P G P | P Y L Q P S H S N L | L S H Q S P S N L N | Q S S V N P Q G A V | L D Y G N T K P L S | H Y K A D C G Q G G |
| P G S G Q S K P A L | M A Y L P Q Q L P H | L S N E Q N S L F L | M K Q K A A N M P F | R S L V P P G Q E Q | N P S N V S V P A Q |
| T A N V G T Q P P S | V S V A S T H N S S | P Y L S S Q Q Q A A | V M K Q H Q L L L D | Q Q K Q R E Q Q Q L | Q Q Q Q Q Q L Q R   |
| Q H L L A E Q E K Q | Q F Q R P S A A V P | G M N N L G P S N S | S C P R V F P Q P G | T L M S M G P G H A | P V S S L P S S S G |
| P Q D R G V A Q F T | G S Q S L P Q S S L | Y G I T S G L P Q I | V A Q P P P Q A A S | A H A H I P R Q T S | V G Q N A S A P A A |
| Y G Q N S L G S A G | L S Q Q H N K G T L | P P G L T K S Q V P | R V S A A M G G Q N | A S W Q H Q G M P N | L S S Q T P G N S S |
| V S P F A A P S S F | H M Q Q A H L K I P | G Q Q F S Q A M P S | R P M A P M S S A G | A A G S M L P P V S | T Q Q R N S A P A P |
| A P P Q A A P Q Q G | L P G L S P A G P E | L G A F S Q S S T S | Q M N S R A G L H C | T Q A Y P V R T M G | Q E L P F A F S G Q |
| P G S S G L S S V A | G H T D L I D S L L | K N R T S E E W I N | E L D D L L G S Q   |                     |                     |

G3H7X9 (100%), 68,661.3 Da

Nicastrin OS=Cricetulus griseus GN=I79\_006475 PE=4 SV=1

4 exclusive unique peptides, 4 exclusive unique spectra, 4 total spectra, 44/615 amino acids (7% coverage)

|                     |                     |                     |                     |                     |                     |
|---------------------|---------------------|---------------------|---------------------|---------------------|---------------------|
| M V L L E G K L F N | R A V M E K L K G R | T S R I A G L A V T | L A K P N S T S S F | S P S V Q C P N D G | F G I Y S N S Y G S |
| E F A H C K Q T L W | N E L G N G L A Y E | D F S F P I F L L E | D E N E T K V I K Q | C Y Q D H N L A Q N | G S A P R F P L C A |
| M Q L F S H M H A V | I S T A T C M R R S | F I Q S T F S I N P | E I V C D P L S D Y | N V W S M L K P I N | T S G A L E P D D R |
| V V V A A T R L D S | R S F F W N V A P G | A E S A V A S Y V T | Q L A A A E A L H K | A S D V A T L P R N | V M F V F F Q G E T |
| F D Y I G S S R M V | Y D M E N G K F P V | R L E N I D S F V E | L G Q V A L R T S L | D L W M H T D P M S | Q K N E S V K N Q V |
| E D L L V T L E K S | G A G V P E V V L R | R Q N Q S Q A L P P | S S L Q R F L R A R | N I S G V V L A D H | S G S F H N R Y Y Q |
| S I Y D T A E N I N | V T Y P E R Q S P E | E D L N F V T D T A | K A L A N V A T V L | A R A L Y E L A G G | T N F S D S I Q A D |
| P Q T V T R L L Y G | F L V R A N N S W F | Q S I L R Q D L R S | Y L D D G P L Q H Y | I A V T S P T N T T | V V V Q Y A L A N L |
| T G K V T N L T R E | Q C Q D P S K V P N | E S K A L Y D Y S W | V Q G P L N S N K T | E R L P R C V R S T | V R L A R A L S P A |
| F E L S Q W G S T E | Y S T W A E S R W K | D I Q A R I F L V A | S K E L E F I T L T | V G F G I L I F S L | I V T Y C I N A K A |
| D V L F V A P R E P | G A V S Y           |                     |                     |                     |                     |

G3H902 (100%), 93,714.9 Da  
 Prostaglandin F2 receptor negative regulator OS=Cricetulus griseus GN=I79\_006863 PE=4 SV=1  
 2 exclusive unique peptides, 2 exclusive unique spectra, 4 total spectra, 20/830 amino acids (2% coverage)

|             |              |            |            |                |                  |            |
|-------------|--------------|------------|------------|----------------|------------------|------------|
| MASVCRGRVV  | RVPSSGSLVRV  | VGTELVIPC  | VSDYDGP    | IEQ            | NFDWSFSSSG       | SSFLELASTW |
| EPGFPAQLYR  | ERLQRGDILL   | RRTANDAVEL | HIKNVQPSDQ | GHYKCSTPST     | DATVQGNVED       |            |
| TVQVKVLADA  | LVLVGPSSRPP  | PGLSLREGE  | FELRCITSTM | SPLHTHLALR     | WELHRGVPVHR      |            |
| SILALSHAGR  | FHPGPGYEQ    | YHSGDVR    | <b>LDT</b> | <b>AGSDAYR</b> | LSV              | ARALSADQGS |
| EQGNWQEQE   | KAVEVATVVI   | QPTALQLAVP | RTVSVTEGKD | LDLSCNITTD     | RVDVDRPEVT       |            |
| WYFKKTPDAS  | LLASHMLARL   | DRDSLHSSP  | HVALSHVDTR | SYHLLVRDAS     | KENSGYLCCL       |            |
| VALWAPGHNR  | SWHKVAEAMS   | APSSVSVTWL | EPEYQVYVNA | SKVPGFSDDP     | TELQCRVJDM       |            |
| KRVEAGVRLT  | VSWYYRMRNR   | IGDEVVASEL | LAVMDGDWTL | RYGERSKQRA     | <b>QSGEFIFSK</b> | <b>E</b>   |
| HTDTFSFRIQ  | RTTEEDRGN    | YCVVSAWTRQ | RNNSWVKSKD | VFSKPVNIFW     | ASEDSVLVVR       |            |
| ARQPKPFAA   | GNTFEMTCKV   | SSKNIKSPRY | SVLITAEKPV | GDLTSPNETK     | YIISLDQDSV       |            |
| VKLENWTDAS  | RVDGCVLEKV   | QEDEFRYRMY | QTQVSDAGLY | RCMVTAWSPI     | GGSLWREAAAT      |            |
| SLSNPIEIDF  | QTSDDMAFDV   | SWFAVHSGFL | DKDPVLLSSL | DRKGVVTTGQ     | RDWKSTLSLE       |            |
| RVSVLEFLLQ  | VHGSSEDMQDFG | NYYCSVTPWV | RSPTGWSQRE | AEIHSRPIFI     | TVKMDVLSNAF      |            |
| KYPLLLIGVGL | STVIGLLSCL   | IGYCSSSHWC | KKEVRETRRE | RRRLMSMEMD     |                  |            |

CP7

Q9HDC9 (100%), 46,481.5 Da  
 Adipocyte plasma membrane-associated protein OS=Homo sapiens GN=APMAP PE=1 SV=2  
 19 exclusive unique peptides, 22 exclusive unique spectra, 26 total spectra, 146/416 amino acids (35% coverage)

|                            |                    |                   |                    |                     |                            |            |
|----------------------------|--------------------|-------------------|--------------------|---------------------|----------------------------|------------|
| MSEADGLR                   | <b>QR</b>          | <b>RPLRPQVVTD</b> | <b>DDGQAPEAKD</b>  | <b>GSSFSGRVFR</b>   | VTFLMLAVSL                 | TVPLLGAMML |
| LESPIDPQPL                 | SFK <b>EPPLLLG</b> | <b>VLHPNTKLRQ</b> | <b>AERLFFENQLV</b> | <b>GPESIAHIGD</b>   | VMFTGTADGR                 |            |
| VVK <b>LENGEIE</b>         | <b>TIA</b> RFGSGPC | <b>KTRDDEPVCG</b> | <b>RPLGIRAGPN</b>  | GTFLFVADAYK         | GLFEVNPWKR                 |            |
| EVK <b>LLLSSET</b>         | <b>PIEG</b> KNMSFV | NDLTVTQDGR        | <b>KIYFTDSSSK</b>  | WQR <b>RDYLLLV</b>  | <b>MEGTD</b> <b>DDGRLL</b> |            |
| <b>EYD</b> <b>TVTR</b> EVK | VLLDQLRFPN         | GVQLSPAEDF        | VLVAETTMAR         | IRRV <b>YV</b> SGLM | <b>KGGADL</b> FVEN         |            |
| MPGFPDNIRP                 | SSSGGYWVGM         | STIRPNPGFS        | MLDFLSERPW         | IKRMIFK <b>LF</b> S | <b>QETVM</b> <b>K</b> FVPR |            |
| YSLVLELSDS                 | GAFRRS <b>LHDP</b> | DGLVATYISE        | VHEHDGHLYL         | GSRSPFLCR           | LSLQAV                     |            |

A0A061I3K8 (100%), 160,726.0 Da  
 Calnexin OS=Cricetulus griseus GN=H671\_7g18220 PE=3 SV=1  
 10 exclusive unique peptides, 12 exclusive unique spectra, 14 total spectra, 115/1479 amino acids (8% coverage)

|                           |                    |             |                    |                    |                   |           |                                     |      |
|---------------------------|--------------------|-------------|--------------------|--------------------|-------------------|-----------|-------------------------------------|------|
| MEGKWL                    | LCLL               | LVLGTVAVQA  | HDGHDDDMID         | IEDDLDDVIE         | EVEDSKSK          | <b>SD</b> | <b>SSTPPSPK</b>                     | VT   |
| YK <b>APVPTGEV</b>        | <b>YFADSFDR</b>    | GS          | LSGWILSKAK         | <b>KDDTDDEIAK</b>  | YDGKWEVDEM        |           | KDTKLP                              | GDKG |
| LVLMSRAKHH                | AISAKLNKPF         | LFDTKPLIVQ  | LHFIFRHKNP         | YEVNFQNGIE         | CGGAYVKLLS        |           | K <b>TSELNLDQF</b>                  |      |
| <b>HDKT</b> <b>PYTIMF</b> | <b>GPDK</b> CGEDYK | LHFLFRHKNP  | GNLNDMTPA          | KTGVYEEKHA         | KRPDSDLKIY        |           | FTDKKTHLYT                          |      |
| LILNPDNSFE                | ILVDQYVNS          | PEGWLDDEPE  | YIPDPDADKP         | VNPSREIEDP         | EDQKPEDWGE        |           | RPKIPDPDAV                          |      |
| KPDDWDEDAP                | GKIPDEEATK         | PEGWLDDEPE  | NPNYQGVWKP         | WANDGWGLKK         | EDWDEDMDGE        |           | WEAPQIANPK                          |      |
| CESAPGCGVW                | QR <b>PLIDNPNY</b> | KGKWKPPMID  | NPNYQGVWKP         | NAMEYK <b>KTDA</b> | RKIPNPDFFE        |           | DLEPFKMTPF                          |      |
| SAIGLELWSM                | TSDIFFDNFI         | ISGDRRVVDD  | WANDGWGLKK         | PTAEEDEILN         | <b>AADGAAEPGV</b> |           | <b>VGHM</b> LEAAEE                  |      |
| RPWLWVVYIL                | TVALPVFLVI         | LFCCSGKKQS  | NAMEYK <b>KTDA</b> | TRREAPLGIS         | <b>AQPDVKEDEG</b> |           | <b>KEEEEK</b> <b>KNK</b> <b>GDE</b> |      |
| <b>EEEEEKLEEK</b>         | QKSDAEEEDGG        | TGSQDEEDRK  | PTAEEDEILN         | VSANGLPPAS         | RSPRNRKPRR        |           | ESWDLWHLHD                          |      |
| TVKRNLDSAA                | SPQNGDQQNG         | YGDLPFGHKK  | TRREAPLGIS         | LSLSKELKQE         | VSANGLPPAS        |           | PLGQPDKPPG                          |      |
| GDALQSGGKH                | SLGLDPINKK         | CMADSSIHLLN | GSSNPNEPFP         | LFTEDFEEKK         | LSLSKELKQE        |           | PVDDLPCMIA                          |      |
| GAGGSVQSNS                | LMPDLNLEEQ         | EWKELIEELN  | RSVPDEDMKD         | SSAPVGTDS          | LFTEDFEEKK        |           | DPEPPGSATQ                          |      |
| TPLAQDINIK                | TEFSPAAFEQ         | EQLGSPQVRA  | GSAGQTFLLG         | ASSELSSAHQL        | SSAPVGTDS         |           | SLGSSQTLFH                          |      |
| TTGQPGADNP                | SPNLMPASAAQ        | AQNAQRALAS  | VVLPSQGGG          | LDVYPMEKP          | ASSELSSAHQL       |           | QQIAAKQKRE                          |      |
| QMLQNPQAAA                | SAPAPGQLST         | WQQAGPSHSP  | LDVYPMEKP          | QSSVNNQGA          | ASPPGYKQDF        |           | TNSKLLMMPS                          |      |
| VNKSSPRPGG                | PYLQPSHSNL         | LSHQSPSNLN  | QSSVNNQGA          | LDYGNTPKPLS        | LDYGNTPKPLS       |           | HYKADCGQGG                          |      |
| PGSGQSKPAL                | MAYLPQQLPH         | LSNEQNSLFL  | MKQKAAANMPF        | RSLVPPGQEQ         | LDYGNTPKPLS       |           | NPSNVSVPAQ                          |      |
| TANVGTQPPS                | VSAVSTHNS          | PYLSNSQQA   | VMKQHQLLLD         | QQKQREQQQL         | RSLVPPGQEQ        |           | QQQQQVFLQR                          |      |
| QHLLEAEQEKQ               | QFQRPSAAVP         | GMNLLGPSNS  | SACPRVFPQPG        | TLMMSMGPGHA        | QQKQREQQQL        |           | PVSSLPSSSG                          |      |
| PQDRGVAQFT                | GSQSLPQSSSL        | YGITSGLPQI  | VAGPPPPQAS         | AHAHAPRQTS         | TLMMSMGPGHA       |           | VGQNASAPAA                          |      |
| YGQNSLGSAG                | LSQQHNLKGT         | PPGLTKSQVP  | RVSAAAMGGQN        | ASWQHQGMPN         | AHAHAPRQTS        |           | LSSQTPGNS                           |      |
| VSPFAAPSFF                | HMQQAHLKIP         | GQQFSGQMP   | RPMAAMSGAG         | AAGSMPLPV          | ASWQHQGMPN        |           | TQQRNSAPAP                          |      |
| APPQAAPOQG                | LPGLSPAGPE         | LGAFSQSSTS  | QMNSRAGLHC         | TQAYPVRTMG         | AAGSMPLPV         |           | QELPFAFSGQ                          |      |
| PGSSGLSVA                 | GHTDLIDSL          | KNRTSEEWIN  | ELDDL              | LG                 | TQAYPVRTMG        |           |                                     |      |

**G3HQ1 (100%), 186,663.3 Da**

Cation-independent mannose-6-phosphate receptor OS=Cricetulus griseus GN=i79\_009791 PE=4 SV=1

14 exclusive unique peptides, 14 exclusive unique spectra, 14 total spectra, 152/1700 amino acids (9% coverage)

|                    |                       |                     |                    |                     |                    |               |         |
|--------------------|-----------------------|---------------------|--------------------|---------------------|--------------------|---------------|---------|
| MPLVCSLYVH         | PLP L L I G D S L     | LRSSSRSLLE          | FNTTTDCQPS         | DSQHR               | <b>TQTSI</b>       | <b>TFLCGK</b> | T L G T |
| PEFVTATDCV         | HYFEWRTTAA            | CKKDIKADK           | EVPCYAFDDK         | LKKHDLNPLI          |                    | KLSSGGYLVDD   |         |
| SDPETS L F I N     | VCR <b>DIDSLRD</b>    | <b>PSTQLRACPA</b>   | <b>GTAACLKGD</b>   | QAFDVGGRPKE         |                    | GLKLVSKDRLL   |         |
| VL SY VKEEAE       | KPDFCNGHSP            | AVTITFVCP S         | ERRREGTIPKL        | TASSNCRYEVE         |                    | EWITEYACHR    |         |
| DYLESETCSL         | SSEQHDI A I D         | LSPLAQGGGS          | SYVSDGREYT         | FYINVCGNAT          |                    | VPLCNLKE SA   |         |
| VCQVKKADST         | QVKIAGRHNQ            | QTLRYSDGDL          | TLIYSGGDEC         | SSGFQRM SVI         |                    | NFECNKTAGN    |         |
| DGRGEPVFTG         | EVDCTYFFTW            | DTRYACVKEK          | <b>EDLLCGVSDG</b>  | <b>KKRYDLSVLA</b>   | <b>RHSESEKNWE</b>  |               |         |
| AVDGDQAES E        | KKYFFINVC H           | RVLQEGKARS          | CPEDAAVCAV         | DKNGSKNLGK          | FVSSPTSEK G        |               |         |
| YIQLSYSDGD         | DCGSDKKIT T           | NITLVCKPGD          | LESAPVLRTA         | GPDGCFYEF E         | WHTAAA CVLS        |               |         |
| KTEGENCTVF         | DAQAGFSFDL            | SPLTKKNGAY          | KVGT EKYDFY        | INVC GPVSDV         | LCQPN SGACQ        |               |         |
| VAKRQEEEDNS        | TYNFRWYTSY            | ACPEEPL E CM        | VTDPSMMEQY         | DLSSLVKSEG          | RSGGNWAYME         |               |         |
| NSREHVT R R K      | YYINVC R <b>PLN</b>   | <b>PVPGCDRYAA</b>   | ACQMRYENSE         | GSLAETVSI S         | NLGVAKTG P V       |               |         |
| VEESGSL L L E      | YVNGSACTTS            | DGRLTTYSTR          | IHLVCGRGS L        | NTHPIFTY NW         | ECVVSFLWNT         |               |         |
| EACAPIQITIT        | DTDQACSIRD            | PNSGFVFNLS          | PLNR <b>SQGYVV</b> | <b>PGIGK</b>        | ICGAMPECGT         |               |         |
| IAGNPAFGCE         | AGTQTELES L           | KPERPVGMEK          | SLQLSTEGFL         | TLYKGS SPS          | DKGTAFAIR <b>F</b> |               |         |
| <b>ICNDDIYPGT</b>  | <b>AKFLHQDIDS</b>     | TRGIRNTFFE          | FETALACVPS         | RVDCQVTDPA          | GNEYDL SALS        |               |         |
| MAGK PWTAVD        | TSVDGKKR SF           | YLSVCTPLPY          | IPGCHGSAVG         | SCMVLPAEDR          | GLNLGVVQIS         |               |         |
| PQADANGSLS         | ILYVNGDKCF            | NQR FSTR I I F      | ECAQT LGS PV       | FQFVKDCEYM          | <b>FVWRTVEACP</b>  |               |         |
| <b>VVR</b> EEGDNCQ | VKDP RHGNFY           | DLKPLALS DT         | IITAGEYTY Y        | FRVCGK <b>LSSN</b>  | <b>VCHVRD</b> GSKV |               |         |
| VSSCQEKKGS         | QGFQKVA GLL           | TQKLT YENGL         | LKMNYTGGDT         | CHQVYQRSTT          | IYFYCDRSTQ         |               |         |
| KPVFLRETTD         | CSYL F EWR T Q        | YACPPFNVTE          | CSTQD GAGNS        | IDLSSL S RYS        | DNWEAVTRTG         |               |         |
| ATEHYLINIC         | KSLS P RAGGG          | EPCPPEAAVC          | LLDGS KPLNL        | GKVRDGPQWT          | GGVTVLK <b>YVD</b> |               |         |
| <b>GDLCPDQIRK</b>  | RST I I R <b>FTCS</b> | <b>ESQVSSRPLF</b>   | ISAVQDC EYT        | FSWPTPAACP          | VKNSTHDDCQ         |               |         |
| VTNPSTGHLF         | DLSSLSGEGAG           | <b>VTVSYSEKGL</b>   | VYMS ICGENE        | NCGAGV GACF         | GQTRISV GKA        |               |         |
| SKR LSYVDQV        | LQLVYEEGSL            | CPSKSGLR YK         | SVISFVCRPE         | AGPTNR PMLI         | SLDKQCT L F        |               |         |
| FSWHTPLACE         | QVTECTVRNG            | SSIIDLSP LI         | HRTGGYEAYD         | ESEDGTS DTT         | PDFYINICQP         |               |         |
| LNP MHG V P C P    | AGAAVCK <b>VPV</b>    | <b>NGPPIDIGRV</b>   | TG P P I F N P V A | NEVYLN FESS         | TPCLADKHMN         |               |         |
| YTS L IAFHCK       | RGVSMGTPK L           | I R T N D C D F V F | EWET P I V C P D   | E V K T Q G C S V T | DEQLLYS FNL        |               |         |
| TSLS T S T FKA     | RLPS IARGSD           |                     |                    |                     |                    |               |         |

**P10909 (100%), 52,495.0 Da**

Clusterin OS=Homo sapiens GN=CLU PE=1 SV=1

2 exclusive unique peptides, 2 exclusive unique spectra, 2 total spectra, 19/449 amino acids (4% coverage)

|                 |                    |                   |                    |             |             |
|-----------------|--------------------|-------------------|--------------------|-------------|-------------|
| MMKTL L L F V G | LLLTWES GQV        | LGDQTVSDNE        | LQEMSNQGS K        | YVNKEIQNAV  | NGVKQIK TLI |
| EKTNEERKTL      | LSNLEEA KKK        | KEDALNETRE        | SETK LKELPG        | VCNETMMALW  | EECKPCLKQT  |
| CMKFYARVCR      | <b>SGSGLVGR</b> QL | EEFLNQSSPF        | YFWMNGDRID         | S LLENDRQQT | HMLDVMQDHF  |
| SRASS I I DEL   | FQDRFFTR EP        | QDTYHYLSPFS       | LPHRRPHFFF         | PKSRIVRSLM  | PFSPEQLNLF  |
| HAMFQ P F L E M | IHEAQQAMDI         | HFHSPAFOHP        | PTEF I R E G D D   | DRTVCREIRH  | NSTGCLR MKD |
| QCCKCREILS      | VDCSTNNPSQ         | AKLR <b>ELDES</b> | <b>LQVAER</b> LTRK | YNELLKSYQW  | KMLNTSS LLE |
| QLNEQFNWVS      | RLANLTQGED         | QYYLRVTVA         | SHTSDSDVPS         | GVTEVVVKLF  | DSDPITVTV P |
| VEVSRKNPKF      | METVAEKALQ         | EYRKKHREE         |                    |             |             |

**F1LPC5 (100%), 63,343.8 Da**

Protein Tmem259 OS=Rattus norvegicus GN=Tmem259 PE=1 SV=2

3 exclusive unique peptides, 3 exclusive unique spectra, 3 total spectra, 30/574 amino acids (5% coverage)

|                   |             |                    |                     |                    |                     |
|-------------------|-------------|--------------------|---------------------|--------------------|---------------------|
| MSEHAAPGP         | GPNGGGGGGA  | APVGRPR <b>GPN</b> | <b>LNPNPLINVR</b>   | DRLFHALFFK         | MAVTYSRLF P         |
| PAFRRLFEFF        | VLLKALFVLF  | VLAYIHIVFS         | RSPINCLEHV          | RDRWPREGLV         | RVEVTRHNSR          |
| APVILQFCDG        | GLGGDLLEPG  | GLELEEELS          | VEMFTNSSIK          | <b>FELDIEPK</b> VF | KPPGGADALN          |
| DSQDFPFPE T       | PAKAWPQDEY  | IVEYSLEYGF         | LRLSQATRQR          | LSIPVMVVT L        | DPTR EQCFGD         |
| RFSRL L L L D F G | LYGDDVLMSS  | VKGLAENEEN         | KGFLR <b>NVVS G</b> | <b>EHYR</b> FVSMWM | ARTSYLAAFV          |
| IMVIFTLSVS        | MLLRYSHHQI  | FVFIVDL LQM        | LEMNMAIAFP          | AAPLTLVILA         | LVGMEAIMSE          |
| FFNDT T T A F Y   | IILIVWLADQ  | YDAICCHTNT         | SKRHWR LFFY         | LYHFAFYAYH         | YRFNGQYSS L         |
| ALVTSWLFIQ        | HSMIYFFHHY  | ELPALQQRIR         | IQEMLLQTPP          | LGPPTPTALP         | DDLNNNSGSP          |
| ATPDPSPLA         | LGPS SSPAPT | GGASGPGSLG         | AGASVSGSDL          | GWVAETA A I I      | S D A S F L S G L S |
| ASLLER R P A A    | PSAPDSARPD  | P GAS L E D A P A  | PAGS                |                    |                     |

**CP8**

**Q9HDC9 (100%), 46,481.5 Da**

Adipocyte plasma membrane-associated protein OS=Homo sapiens GN=APMAP PE=1 SV=2

8 exclusive unique peptides, 10 exclusive unique spectra, 10 total spectra, 100/416 amino acids (24% coverage)

|                    |                    |                   |                    |                     |                    |
|--------------------|--------------------|-------------------|--------------------|---------------------|--------------------|
| MSEADGLRQR         | <b>RPLRPQVVT D</b> | <b>DDGQAPEAKD</b> | GSSFSGRVFR         | VTF LMLAVS L        | TVPLLGAMML         |
| LESPI DPQPL        | SFKEPPLLLG         | VLHPNTKLRQ        | AER <b>LFENQLV</b> | <b>GPESIAH</b> IGD  | VMFTGTADGR         |
| VVK <b>LENGEIE</b> | <b>TIA</b> RFGSGPC | KTRDDEPVCG        | RPLGIRAGPN         | GTLFVADAYK          | GLFEVNPWKR         |
| EVK <b>LLLSSET</b> | <b>PIE</b> GKNMSFV | NDLTVTQDGR        | KIYFTDSSSK         | WQRR <b>DYLLLV</b>  | <b>MEGTD DGRLL</b> |
| EYDVT TREVK        | <b>VLLDQLR</b> FPN | GVQLSPAEDF        | LVAETTMR           | IRRVYVSGLM          | KGGADLFVEN         |
| MPGFPDNI RP        | SSSGGYWVGM         | STIRPNPGFS        | MLDFLSERPW         | IKRMIFK <b>LFS</b>  | <b>QETVMK</b> FVPR |
| YSLVLELSDS         | GAFRRSLHDP         | DGLVATYISE        | VHEHDGHL YL        | G S F R S P F L C R | L S L Q A V        |

A0A096P063 (100%), 34,826.0 Da

Arginase OS=Papio anubis GN=ARG1 PE=3 SV=1

2 exclusive unique peptides, 2 exclusive unique spectra, 2 total spectra, 22/323 amino acids (7% coverage)

```
MSAKSR TIGI IGAPFSK GQP RGGVEEGPTV LRKAGLLEKL EEQECDVKDY GDLSFADIPN
DSPFQIVKNP RSVGKATEQL AGKVAEVKKN GRISLVLGGD HRS LAIGSIS GHASVHPDLG
VIWVDAHTDI NTPLTTTGN LHGQPVSFLL KELKGIIPDV PGFSWVTPCI SAKDIVYIGL
RDVDPGEHYI LKTLGIKYFS MTEVDRLLGIG KVMEETLSYL LGRKKRPIHL SFDVDGLDPS
FTPATGTPVV GGLSYREGLY ITEEIKTGL LSGLDIMEVN PSLGKTPEEV TRTVNTAVA I
ILACFGVARE GNHKPIDYLN PPK
```

G3HZE5 (100%), 69,919.3 Da

Heat shock 70 kDa protein 1A OS=Cricetulus griseus GN=I79\_016446 PE=3 SV=1

6 exclusive unique peptides, 6 exclusive unique spectra, 14 total spectra, 81/641 amino acids (13% coverage)

```
MAKSTAIGID LGTTYSCVGV FQHGKVEIIA NDQGNRTTPS YVAFTDTERL IGDAAKNQVA
LNPNQNTVFDA KRLLGRKFGD AVVQADMKHW PFQVVDGDK PKVQVSYKGE TRAFYPPEEIS
SMVLTCKMKEV AEAYLGHVPV NAVITVPAYF NDSQRQATKD AGVIAGLNVL R IINEPTAAA
IAYGLDRSGK GERNVLI FDL GGGTFDVSIL TIDDGIFEVK ATAGDTHLGG EDFDNRLVSH
FVEEFKRKHK KDISQNKRAV RRLRTACERA KRTLSSSTQA NLEIDSLFEG IDFYTSITRA
RFEELCADLF RGTLEPVEKS LRDAKMDKAK IHDIVLVGGS TRIPKVQKLL QDFFNGRDLN
KSI NPDEAVA YGAAVQAAIL MGDKSENVD LLLLDVAPLS LGLETAGGVM TALIKRNSTI
PTKQTQTFIT YSDNQPGVLI QVYEGER AMT RDNNLLGRFE LSGIPPA PRG VPQIEVTFDI
DANGILNVTATDKSTGKANK ITITNDKGR L SKEEIER MVQ EAERYKAEDE VQRERVA AKN
ALESYAFNMK SAVEDEGLKG KISEADRKKV LDGCQEVISW LDANTLADKE EFVHKRQELE
RVCGP I V SGL YQGAGAPGAG GFGAQAPKGG SSGSPTIEEV D
```

P29508 (100%), 44,565.9 Da

Serpin B3 OS=Homo sapiens GN=SERPINB3 PE=1 SV=2

22 exclusive unique peptides, 27 exclusive unique spectra, 28 total spectra, 194/390 amino acids (50% coverage)

```
MNSLSEANTK FMFDL FQQR KSKENNI FYS PISITSA LGM VLLGAKDNTA QQIK KVLHFD
QVTENTTGKA ATYHVDRSGN VHHQFQKLLT EFNK STDAYE LKIANKL FGE KTYLFLQEYL
DAIKKFYQTS VESVDFANAP EESRKKINSW VESQTNEKIK NLIPEGNIGS NTTLVLVNAI
YFKGQWEKKF NKEDTKEEKF WPNKNTYKSI QMMRQYTSFH FASLEDVQAK VLEIPYKGGD
LSMIV LLPNE IDGLQKLEEK LTAEK LMEWT SLQNMRETRV DLHLPRFKVE ESYDLKDTLR
TMGMVDIFNG DADLSGMTGS RGLVLSGVLH KAFVEVTEEG AEAAAATAVV GFGSSPTSTN
EEFHCHNHPFL FFIR QNK TNS ILFYGRFSSP
```

G3HYQ1 (100%), 27,689.8 Da

14-3-3 protein sigma OS=Cricetulus griseus GN=I79\_016192 PE=3 SV=1

6 exclusive unique peptides, 8 exclusive unique spectra, 9 total spectra, 51/248 amino acids (21% coverage)

```
MEKASLIQKA KLA EQAERYE DMAAFMKGAV EKGEELSCEE RNLLSVAYKN VVGGQRAAWR
VLS SIEQKSN EEGSEEK GPE VKE YREKVET ELRGVCDTVL GLLD SHLIKE AGEAGSRV FY
LKMKG DYRY LAEVATGDDK KRIID SARSA YQEAMDISKK EMPPTNPIRL GLALNFSV FH
YEIANSPEEA ISLAKTTFDE AMADLHTLNE DSYK DSTLIM QLLRDNLTLW TADSAGEEGG
EAP EEPQS
```

**Fig.S4** Mass spectrometric identification of APMAP-interacting proteins. Peptides identified by LC-MS/MS after tryptic digestion of eight different APMAP-containing low and high molecular weight protein complexes (CP1-CP8) from selected SEC fractions resolved by native-PAGE (see Fig.3) are highlighted in yellow in the primary sequences. Modifications are highlighted in green.

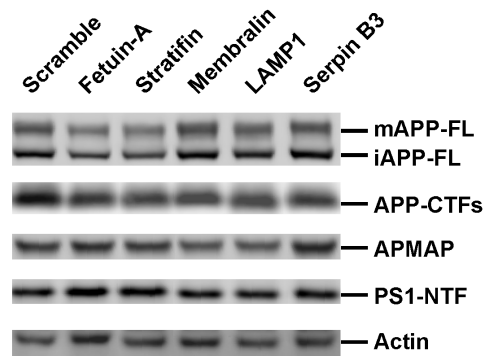

**Fig.S5** Treatments with siRNAs targeting fetuin-A, serpinB3, stratifin, LAMP-1 and membralin do not affect APP-FL, APP-CTFs, or APMAP. The knockdown of the indicated APMAP-interacting proteins was performed as described in Fig.4 by small interfering RNA (siRNA) in HEK cells overexpressing APP bearing the Swedish mutation that causes early-onset familial Alzheimer's disease (HEK-APPswe). Cells were treated for 3 days with siRNA duplexes (listed in the Materials and Methods section) complexed with Lipofectamine RNAiMax (Invitrogen). Whole cell extracts were prepared in HEPES buffer containing 1% NP40 and analyzed by Western blot for the siRNA protein targets APP-FL, APP-CTFs and APMAP. Cells transfected with the allstar control siRNA (scramble) served as negative controls while actin served as a protein loading control. APP-FL: APP full-length; APP-CTFs: APP-C-terminal fragments.

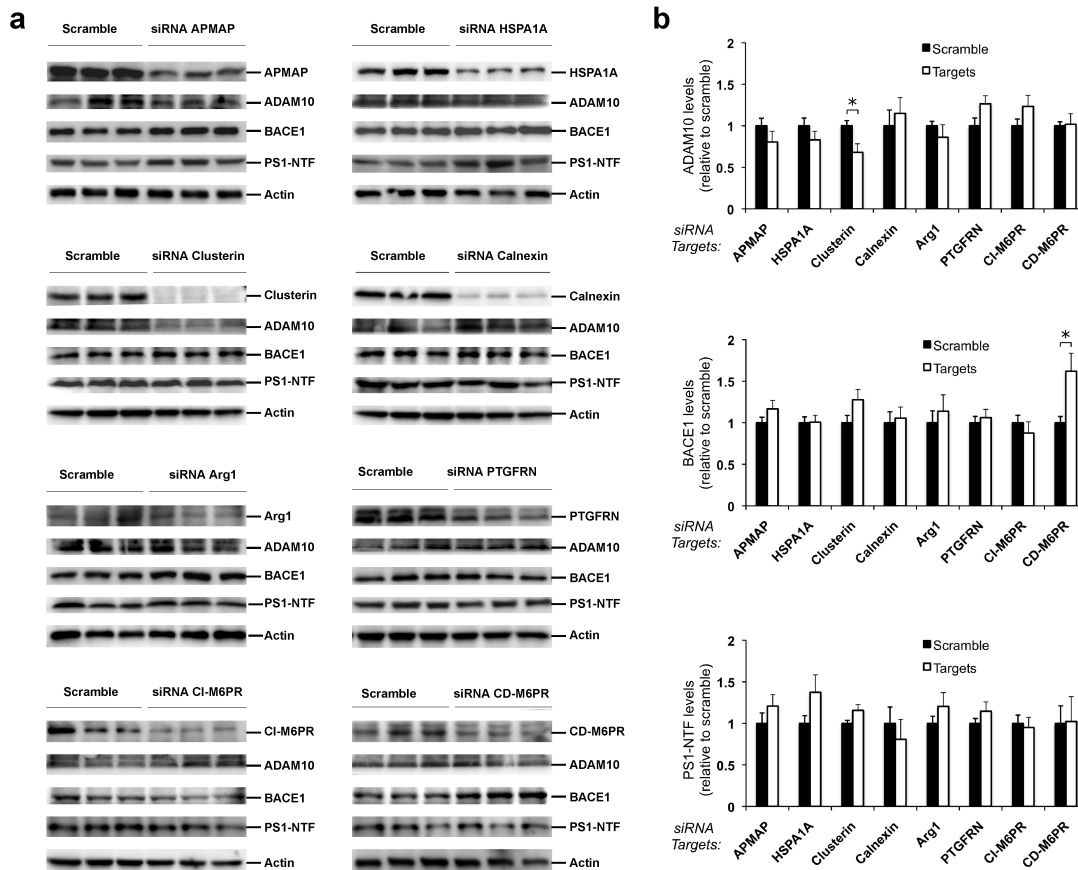

**Fig.S6** Depletion of individual APMAP interacting proteins does not affect the level of  $\alpha$ -,  $\beta$ - or  $\gamma$ -secretases. **a** The same whole-cell extracts as in Fig.4a, prepared from biological triplicates of HEK-APP<sup>Swe</sup> cells treated for three days with siRNA duplexes targeting the indicated APMAP-interacting proteins were analyzed by Western blot for the siRNA proteins targets,  $\alpha$ -secretase ADAM10,  $\beta$ -secretase BACE1 and  $\gamma$ -secretase catalytic site protein presenilin-1 N-terminal fragment (PS1-NTF). Cells transfected with the allstar control siRNA (scramble) served as negative controls while actin served as a protein loading control. **b** Densitometric analysis of the ADAM10, BACE1 and PS1-NTF Western blot bands in (a). Student's *t*-test was applied for statistical analysis; significance is shown as the mean  $\pm$  SEM, \**P*<0.05; ADAM10, BACE1 and PS1-NTF: *n*=3/group.

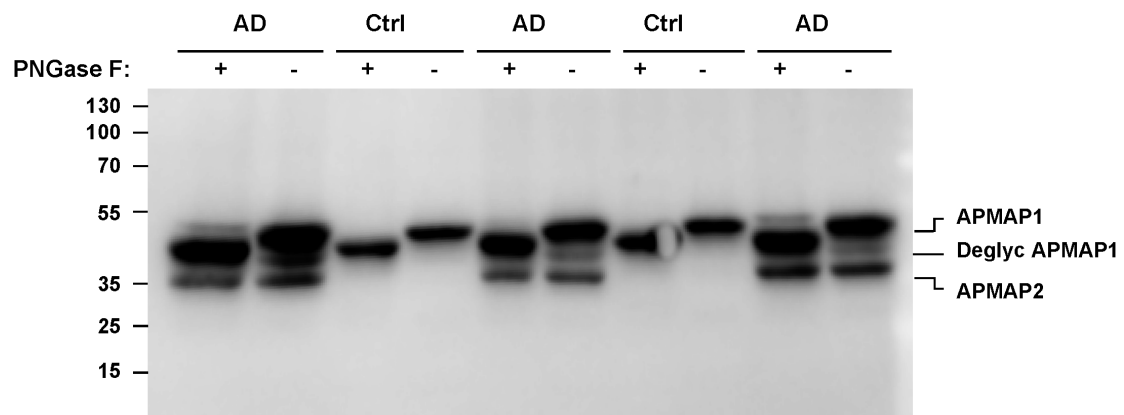

**Fig.S7** N-linked glycosylation of APMAP1 and absence of glycosylation of APMAP2. The glycosylation profiles of APMAP1 and APMAP2 were estimated by Western blot analysis of denatured human cortical lysates of two control brains and three neuropathologically verified AD brains treated for one hour at 37°C in the presence (+) or absence (-) of Peptide-N-glycosidase F (PNGase F) to catalyze the cleavage of N-linked oligosaccharides. For APMAP1, the PNGase-dependent band shift (from APMAP1 to Deglyc APMAP1) reveals an N-linked glycosylation. For APMAP2, the absence of a band shift confirms an unglycosylated protein.

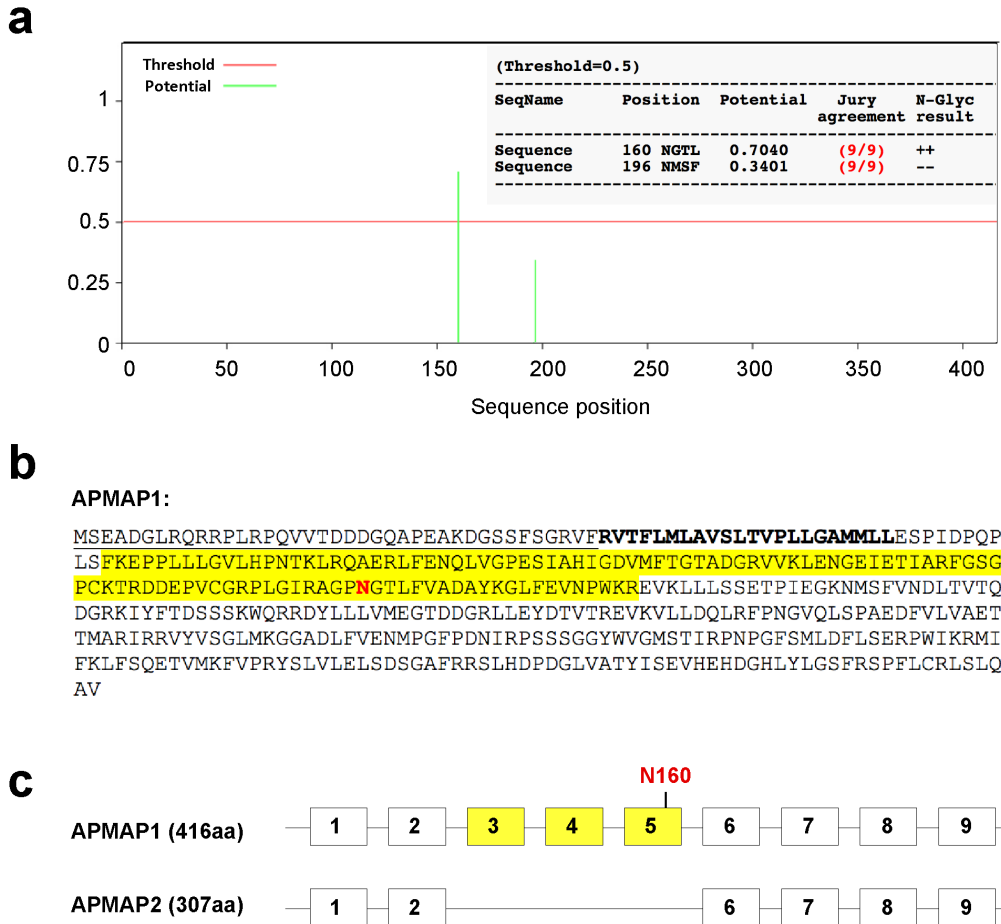

**Fig.S8** APMAP1 predicted N-glycosylation at residue Asn160, while APMAP2 is unglycosylated. **a** Glycosylation site prediction in human APMAP1 with NetNGlyc 1.0 (<http://www.cbs.dtu.dk/services/NetNGlyc/>), by using artificial neural networks that analyzed the sequence context of Asn-Xaa-Ser/Thr. Asn160 was the only site with a predicted high probability N-glycosylation (potential > 0.5 and Jury agreement 9/9). **b** Primary sequence of human APMAP1 with the cytosolic N-terminal domain underlined, the transmembrane domain in bold and exons 3, 4 and 5 in yellow. The predicted N-glycosylated residue Asn160 on exon 5 is displayed in red. **c** The human alternative splicing variant APMAP2 lacks exons 3 and 4 and exon 5 containing the predicted glycosylation site Asn160.



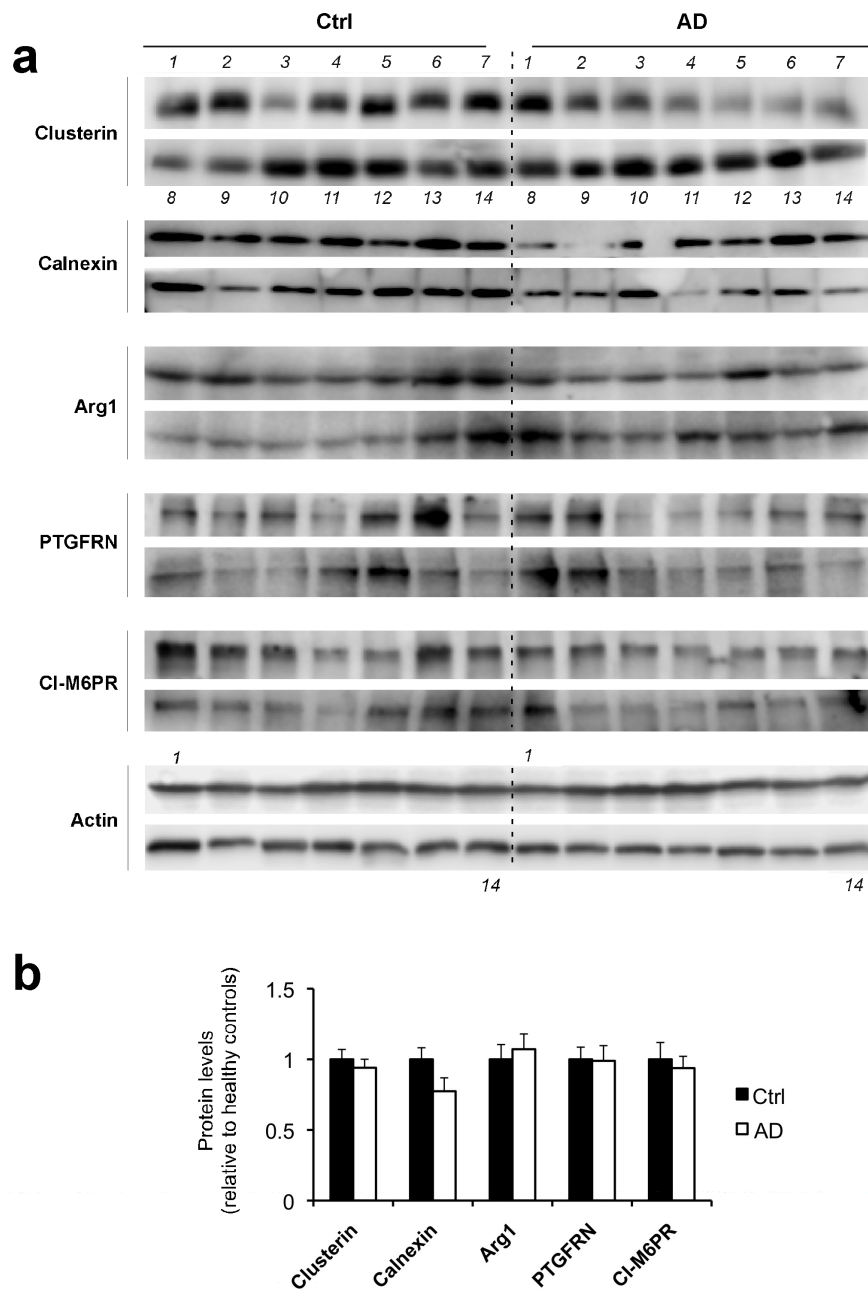

**Fig.S9** The protein levels of the APMAP interactomers clusterin, calnexin, Arg1, PTGFRN and CI-M6PR are unchanged in AD brains. **a** The protein levels of the indicated APMAP interactomers were estimated by Western blot analysis in cortical lysates of 14 control brains and 14 neuropathologically verified AD brains (same samples as in Figure 5). **b** The densitometric analysis of the Western blot bands in (a) revealed no statistically relevant changes (Student's t-test) in the control and AD brains.
